# Supplementary material
Source: PubMed Central journal article supplement (PMC5221420)
Supplement: NIHMS807185-supplement-7.pdf [file NIHMS807185-supplement-7.pdf]

| <b>Supplementary Table S1: 236 genes recurrently mutated in breast cancer and/ or related to DNA repair and/ or potentially actionable cancer genes, present on all three platforms analysed in this study.</b> |
|-----------------------------------------------------------------------------------------------------------------------------------------------------------------------------------------------------------------|
| ABCA13                                                                                                                                                                                                          |
| ABCB1                                                                                                                                                                                                           |
| ADAMTSL1                                                                                                                                                                                                        |
| AGFG2                                                                                                                                                                                                           |
| AHNAK2                                                                                                                                                                                                          |
| AK9                                                                                                                                                                                                             |
| AKAP9                                                                                                                                                                                                           |
| AKT1                                                                                                                                                                                                            |
| AKT2                                                                                                                                                                                                            |
| AKT3                                                                                                                                                                                                            |
| ANK3                                                                                                                                                                                                            |
| AOAH                                                                                                                                                                                                            |
| APC                                                                                                                                                                                                             |
| APOBEC1                                                                                                                                                                                                         |
| APOBEC2                                                                                                                                                                                                         |
| APOBEC3A                                                                                                                                                                                                        |
| APOBEC3C                                                                                                                                                                                                        |
| APOBEC3D                                                                                                                                                                                                        |
| APOBEC3F                                                                                                                                                                                                        |
| APOBEC3G                                                                                                                                                                                                        |
| APOBEC3H                                                                                                                                                                                                        |
| APOBEC4                                                                                                                                                                                                         |
| ARAF                                                                                                                                                                                                            |
| ARID1A                                                                                                                                                                                                          |
| ATM                                                                                                                                                                                                             |
| ATN1                                                                                                                                                                                                            |
| ATR                                                                                                                                                                                                             |
| ATRX                                                                                                                                                                                                            |
| AURKA                                                                                                                                                                                                           |
| AURKB                                                                                                                                                                                                           |
| AURKC                                                                                                                                                                                                           |
| BIRC5                                                                                                                                                                                                           |
| BRAF                                                                                                                                                                                                            |
| BRCA1                                                                                                                                                                                                           |
| BRCA2                                                                                                                                                                                                           |
| BRIP1                                                                                                                                                                                                           |
| CACNA1A                                                                                                                                                                                                         |
| CACNA1C                                                                                                                                                                                                         |
| CACNA1E                                                                                                                                                                                                         |
| CBFB                                                                                                                                                                                                            |
| CDC25A                                                                                                                                                                                                          |
| CDC25B                                                                                                                                                                                                          |
| CDC25C                                                                                                                                                                                                          |
| CDH1                                                                                                                                                                                                            |
| CDK1                                                                                                                                                                                                            |
| CDK4                                                                                                                                                                                                            |
| CDK6                                                                                                                                                                                                            |
| CDKN1A                                                                                                                                                                                                          |
| CDKN1B                                                                                                                                                                                                          |
| CDKN2A                                                                                                                                                                                                          |
| CDKN2B                                                                                                                                                                                                          |
| CEP164                                                                                                                                                                                                          |
| CHD4                                                                                                                                                                                                            |
| CHD6                                                                                                                                                                                                            |
| CHEK1                                                                                                                                                                                                           |
| CHEK2                                                                                                                                                                                                           |
| COL12A1                                                                                                                                                                                                         |
| CTCF                                                                                                                                                                                                            |
| CTNNB1                                                                                                                                                                                                          |
| CUBN                                                                                                                                                                                                            |
| DCHS2                                                                                                                                                                                                           |
| DEPTOR                                                                                                                                                                                                          |
| DMC1                                                                                                                                                                                                            |
| DOCK11                                                                                                                                                                                                          |
| EGFR                                                                                                                                                                                                            |
| EME1                                                                                                                                                                                                            |
| EME2                                                                                                                                                                                                            |
| EPPK1                                                                                                                                                                                                           |
| ERBB2                                                                                                                                                                                                           |
| ERBB3                                                                                                                                                                                                           |
| ERBB4                                                                                                                                                                                                           |
| ERCC1                                                                                                                                                                                                           |
| ERCC2                                                                                                                                                                                                           |
| ERCC3                                                                                                                                                                                                           |
| ERCC5                                                                                                                                                                                                           |
| ESR1                                                                                                                                                                                                            |
| ESR2                                                                                                                                                                                                            |

|          |
|----------|
| FANCA    |
| FANCB    |
| FANCC    |
| FANCD2   |
| FANCE    |
| FANCF    |
| FANCG    |
| FANCI    |
| FANCL    |
| FANCM    |
| FBN1     |
| FGFR1    |
| FGFR2    |
| FGFR3    |
| FGFR4    |
| FMN2     |
| FOXA1    |
| FOXC2    |
| GATA3    |
| GRB2     |
| GRIN2A   |
| GRIN2B   |
| HECW1    |
| HIF1A    |
| HRAS     |
| HRNR     |
| HSP90AA1 |
| HSP90AB1 |
| HUWE1    |
| IGF1R    |
| INPP4B   |
| IRS1     |
| JAK1     |
| JAK2     |
| KIT      |
| KMT2C    |
| KMT2D    |
| KRAS     |
| LAMA1    |
| LAMA5    |
| MACF1    |
| MAP1A    |
| MAP2K1   |
| MAP2K2   |
| MAP2K3   |
| MAP2K4   |
| MAP2K6   |
| MAP3K1   |
| MAP3K10  |
| MAP3K4   |
| MAP4K4   |
| MAPK1    |
| MAPK8    |
| MAPK9    |
| MDM2     |
| MDN1     |
| MED12    |
| MET      |
| MGAM     |
| MGMT     |
| MLH1     |
| MLH3     |
| MRE11A   |
| MSH2     |
| MSH3     |
| MSH5     |
| MSH6     |
| MTOR     |
| MUTYH    |
| MXRA5    |
| NBEAL2   |
| NBN      |
| NCOA3    |
| NCOR1    |
| NCOR2    |
| NEB      |
| NF1      |
| NF2      |
| NR1H2    |
| NRAS     |

|         |
|---------|
| PALB2   |
| PARP1   |
| PARP2   |
| PARP3   |
| PCNXL2  |
| PDGFRA  |
| PDGFRB  |
| PGR     |
| PIK3CA  |
| PIK3CB  |
| PIK3R1  |
| PLEC    |
| PLK1    |
| PLXNA4  |
| PMS1    |
| PMS2    |
| POLB    |
| POLD1   |
| POLE    |
| POLH    |
| POLQ    |
| PRKCA   |
| PRKCB   |
| PRKCD   |
| PRKCG   |
| PTCH1   |
| PTEN    |
| PTK2    |
| RAD50   |
| RAD51   |
| RAD51B  |
| RAD51C  |
| RAD51D  |
| RAD52   |
| RAD54B  |
| RAD54L  |
| RAF1    |
| RB1     |
| RBBP8   |
| RELN    |
| RICTOR  |
| RPS6KB1 |
| RPTOR   |
| RUNX1   |
| SHC1    |
| SHROOM4 |
| SMO     |
| SOS1    |
| SPEN    |
| SPRY1   |
| SPTA1   |
| SRCAP   |
| STAT1   |
| STAT3   |
| SVEP1   |
| TBX3    |
| TENM1   |
| TGFBR1  |
| TGFBR2  |
| TGFBR3  |
| TOP2A   |
| TP53    |
| TP53BP1 |
| TSC1    |
| TSC2    |
| TYK2    |
| UBR4    |
| USP36   |
| WDFY3   |
| XBP1    |
| XPA     |
| XPC     |
| XRCC1   |
| XRCC2   |
| XRCC3   |
| ZFHX3   |
| ZFHX4   |
| ZNF384  |
| ZNF703  |
