# Supplementary material
Source: PubMed Central journal article supplement (PMC5221420)
Supplement: NIHMS807185-supplement-8.pdf [file NIHMS807185-supplement-8.pdf]

|                    |        |              |                                          |    |           |    |    |       |     |        |      |           |                 |     |      |      |      |
|--------------------|--------|--------------|------------------------------------------|----|-----------|----|----|-------|-----|--------|------|-----------|-----------------|-----|------|------|------|
| 27-MGA-metaplastic | ERCC2  | p.Asp245Asn  | missense_variant                         | 19 | 45867575  | C  | T  | SNV   | 79  | 6.33%  | 0.15 | Passenger | PASSENGER/OTHER | LOH | TRUE | TRUE | TRUE |
| 27-MGA-metaplastic | RAD51B | p.Asp210His  | missense_variant                         | 14 | 68353793  | G  | C  | SNV   | 133 | 6.77%  | 0.17 | Passenger | PASSENGER/OTHER | LOH | .    | TRUE | TRUE |
| 27-MGA-metaplastic | TP53   | p.Cys176Phe  | missense_variant                         | 17 | 7578403   | C  | A  | SNV   | 84  | 54.76% | 1    | Driver    | CANCER          | LOH | TRUE | TRUE | TRUE |
| 4-MGA              | ERCC3  | p.Lys597Gln  | missense_variant                         | 2  | 128030479 | T  | G  | SNV   | 141 | 13.48% | 0.83 | Passenger | PASSENGER/OTHER | .   | .    | .    | TRUE |
| 4-MGA              | HRNR   | p.Ser438Thr  | missense_variant                         | 1  | 152192792 | C  | G  | SNV   | 91  | 14.29% | 0.88 | Passenger | PASSENGER/OTHER | .   | .    | .    | TRUE |
| 4-MGA              | SPTA1  | p.Arg156Trp  | missense_variant                         | 1  | 158651382 | G  | A  | SNV   | 113 | 34.51% | 1    | Passenger | PASSENGER/OTHER | .   | .    | .    | TRUE |
| 4-MGA              | TP53   | p.Tyr163Cys  | missense_variant                         | 17 | 7578442   | T  | C  | SNV   | 117 | 46.15% | 1    | Driver    | CANCER          | LOH | TRUE | TRUE | TRUE |
| 4-MGA              | XPC    | p.Arg393Gly  | missense_variant                         | 3  | 14200206  | G  | C  | SNV   | 83  | 13.25% | 0.68 | Passenger | PASSENGER/OTHER | LOH | .    | .    | TRUE |
| 5-MGA              | LAMA5  | p.Arg79Gly   | missense_variant                         | 20 | 60942066  | T  | C  | SNV   | 48  | 20.83% | 0.84 | Passenger | PASSENGER/OTHER | .   | .    | .    | TRUE |
| 5-MGA              | MED12  | p.Asp1204Glu | missense_variant                         | X  | 70349200  | C  | A  | SNV   | 62  | 22.58% | 0.91 | Passenger | PASSENGER/OTHER | .   | TRUE | .    | TRUE |
| 5-MGA              | MXRA5  | p.Glu58Lys   | missense_variant                         | X  | 3261703   | C  | T  | SNV   | 91  | 20.88% | 0.84 | Passenger | PASSENGER/OTHER | .   | TRUE | .    | TRUE |
| 5-MGA              | TP53   | p.Leu265fs   | frameshift_variant                       | 17 | 7577146   | T  | TA | Indel | 50  | 38.00% | 1    | .         | .               | LOH | TRUE | TRUE | TRUE |
| 5-MGA              | TSC2   | p.Ala289Val  | missense_variant                         | 16 | 2108765   | C  | T  | SNV   | 78  | 20.51% | 0.82 | Passenger | PASSENGER/OTHER | LOH | .    | .    | TRUE |
| 5-MGA-DCIS         | AHNAK2 | p.Pro3265Ser | missense_variant                         | 14 | 105411995 | G  | A  | SNV   | 98  | 43.88% | 1    | Passenger | PASSENGER/OTHER | LOH | .    | .    | TRUE |
| 5-MGA-DCIS         | BRIP1  | p.Lys1086Arg | missense_variant                         | 17 | 59761150  | T  | C  | SNV   | 194 | 22.16% | 1    | Passenger | PASSENGER/OTHER | .   | .    | .    | TRUE |
| 5-MGA-DCIS         | KMT2C  | p.Arg.894Gln | missense_variant                         | 7  | 151932990 | C  | T  | SNV   | 80  | 3.75%  | 1    | Passenger | PASSENGER/OTHER | .   | .    | .    | TRUE |
| 5-MGA-DCIS         | TP53   | p.Val1173Leu | missense_variant                         | 17 | 7578413   | C  | A  | SNV   | 180 | 30.56% | 1    | Driver    | CANCER          | LOH | TRUE | TRUE | TRUE |
| 5-MGA-DCIS         | ZFXH3  | p.Lys801Asn  | missense_variant                         | 16 | 72991642  | T  | A  | SNV   | 139 | 22.30% | 1    | Passenger | PASSENGER/OTHER | .   | TRUE | .    | TRUE |
| 5-MGA-DCIS         | ZFXH4  | p.Asp2894Glu | missense_variant                         | 8  | 77767839  | C  | A  | SNV   | 222 | 17.12% | 1    | Passenger | PASSENGER/OTHER | .   | .    | .    | TRUE |
| 5-MGA-IDC          | FANCD2 | p.Glu807Asp  | missense_variant                         | 3  | 10108928  | G  | T  | SNV   | 198 | 5.05%  | 0.16 | Passenger | PASSENGER/OTHER | .   | .    | .    | TRUE |
| 5-MGA-IDC          | KMT2D  | p.Thr2017Ser | missense_variant                         | 12 | 49435931  | G  | C  | SNV   | 105 | 10.48% | 0.34 | Passenger | PASSENGER/OTHER | LOH | TRUE | TRUE | TRUE |
| 5-MGA-IDC          | LAMA5  | p.Asp79Gly   | missense_variant                         | 20 | 60942066  | T  | C  | SNV   | 105 | 20.00% | 0.84 | Passenger | PASSENGER/OTHER | .   | .    | .    | TRUE |
| 5-MGA-IDC          | MDN1   | p.Ala1405Ser | missense_variant                         | 6  | 90453399  | C  | A  | SNV   | 142 | 23.24% | 0.75 | Passenger | PASSENGER/OTHER | .   | .    | .    | TRUE |
| 5-MGA-IDC          | MED12  | p.Asp1204Glu | missense_variant                         | X  | 70349200  | C  | A  | SNV   | 157 | 18.47% | 0.6  | Passenger | PASSENGER/OTHER | .   | TRUE | .    | TRUE |
| 5-MGA-IDC          | MSH2   | p.Asp502His  | missense_variant                         | 2  | 47690287  | G  | C  | SNV   | 123 | 4.07%  | 0.13 | Passenger | CANCER          | .   | .    | .    | TRUE |
| 5-MGA-IDC          | MXRA5  | p.Glu58Lys   | missense_variant                         | X  | 3261703   | C  | T  | SNV   | 214 | 20.56% | 0.66 | Passenger | PASSENGER/OTHER | .   | TRUE | .    | TRUE |
| 5-MGA-IDC          | SOS1   | p.Gly597Ala  | missense_variant                         | 2  | 39249779  | C  | G  | SNV   | 134 | 11.94% | 0.38 | Passenger | PASSENGER/OTHER | .   | .    | .    | TRUE |
| 5-MGA-IDC          | TP53   | p.Leu265fs   | frameshift_variant                       | 17 | 7577146   | T  | TA | Indel | 158 | 17.09% | 0.55 | .         | .               | LOH | TRUE | TRUE | TRUE |
| 5-MGA-IDC          | TSC2   | p.Ala289Val  | missense_variant                         | 16 | 2108765   | C  | T  | SNV   | 215 | 33.95% | 1    | Passenger | PASSENGER/OTHER | LOH | .    | .    | TRUE |
| 7-ACC              | TP53   | p.Arg273Cys  | missense_variant                         | 17 | 7577121   | G  | A  | SNV   | 77  | 55.84% | 1    | Driver    | CANCER          | LOH | TRUE | TRUE | TRUE |
| 7-MGA              | PTEN   | p.Met134Ile  | missense_variant                         | 10 | 89692918  | G  | T  | SNV   | 892 | 32.06% | 0.96 | Driver    | CANCER          | LOH | TRUE | TRUE | TRUE |
| 7-MGA              | TP53   | p.Arg175His  | missense_variant                         | 17 | 7578406   | C  | T  | SNV   | 687 | 51.97% | 1    | Driver    | CANCER          | LOH | TRUE | TRUE | TRUE |
| 7-MGA-metaplastic  | APC    | p.Ser1539*   | stop_gained                              | 5  | 112175907 | C  | G  | SNV   | 516 | 43.60% | 1    | .         | .               | LOH | TRUE | TRUE | TRUE |
| 7-MGA-metaplastic  | CDKN2A | p.Arg80*     | stop_gained                              | 9  | 21971120  | G  | A  | SNV   | 90  | 47.78% | 1    | .         | PASSENGER/OTHER | LOH | TRUE | TRUE | TRUE |
| 7-MGA-metaplastic  | PTEN   | p.Met134Ile  | missense_variant                         | 10 | 89692918  | G  | T  | SNV   | 688 | 31.10% | 1    | Driver    | CANCER          | LOH | TRUE | TRUE | TRUE |
| 7-MGA-metaplastic  | TP53   | p.Arg175His  | missense_variant                         | 17 | 7578406   | C  | T  | SNV   | 215 | 50.70% | 1    | Driver    | CANCER          | LOH | TRUE | TRUE | TRUE |
| 8-MGA              | BRCA1  | p.Leu1525fs  | frameshift_variant                       | 17 | 41226510  | CT | C  | Indel | 218 | 41.74% | 1    | .         | .               | LOH | TRUE | TRUE | TRUE |
| 8-MGA              | NCOA3  | p.Pro973Leu  | missense_variant                         | 20 | 46268531  | C  | T  | SNV   | 186 | 8.06%  | 0.3  | Passenger | PASSENGER/OTHER | .   | .    | .    | TRUE |
| 8-MGA              | TP53   | p.Arg175His  | missense_variant                         | 17 | 7578406   | C  | T  | SNV   | 191 | 51.83% | 1    | Driver    | CANCER          | LOH | TRUE | TRUE | TRUE |
| 8-MGA              | XPC    | p.Lys391Asn  | missense_variant                         | 3  | 14200210  | C  | G  | SNV   | 235 | 10.21% | 0.39 | Passenger | PASSENGER/OTHER | .   | .    | .    | TRUE |
| 8-MGA-IDC          | BRCA1  | p.Leu1525fs  | frameshift_variant                       | 17 | 41226510  | CT | C  | Indel | 331 | 46.53% | 1    | .         | .               | LOH | TRUE | TRUE | TRUE |
| 8-MGA-IDC          | MACF1  | p.Ile3806Ser | missense_variant                         | 1  | 39900123  | T  | G  | SNV   | 221 | 25.34% | 1    | Passenger | PASSENGER/OTHER | LOH | .    | .    | TRUE |
| 8-MGA-IDC          | TP53   | p.Arg175His  | missense_variant                         | 17 | 7578406   | C  | T  | SNV   | 220 | 36.82% | 1    | Driver    | CANCER          | LOH | TRUE | TRUE | TRUE |
| 9-ACC              | CDH1   | p.Leu669His  | missense_variant                         | 16 | 68857371  | T  | A  | SNV   | 690 | 10.87% | 0.5  | Passenger | PASSENGER/OTHER | .   | TRUE | TRUE | TRUE |
| 9-ACC              | EPPK1  | p.Cys1423Arg | missense_variant                         | 8  | 144943155 | A  | G  | SNV   | 841 | 17.95% | 1    | Passenger | PASSENGER/OTHER | .   | .    | TRUE | TRUE |
| 9-ACC              | ERBB4  | .            | splice_acceptor_variant & intron_variant | 2  | 212484001 | C  | A  | SNV   | 239 | 46.03% | 1    | .         | .               | .   | .    | TRUE | TRUE |
| 9-ACC              | TP53   | p.Met237Ile  | missense_variant                         | 17 | 7577570   | C  | T  | SNV   | 568 | 35.74% | 0.92 | Driver    | CANCER          | LOH | TRUE | TRUE | TRUE |
| 9-ACC-ICNST        | AK9    | p.Ile181Thr  | missense_variant                         | 6  | 109980519 | A  | G  | SNV   | 102 | 16.67% | 0.71 | Passenger | PASSENGER/OTHER | .   | .    | .    | TRUE |
| 9-ACC-ICNST        | ERBB4  | .            | splice_acceptor_variant & intron_variant | 2  | 212484001 | C  | A  | SNV   | 83  | 66.27% | 1    | .         | .               | .   | .    | TRUE | TRUE |
| 9-ACC-ICNST        | KMT2D  | p.Ser843fs   | frameshift_variant                       | 12 | 49444938  | GA | G  | Indel | 140 | 15.00% | 0.49 | .         | .               | LOH | TRUE | TRUE | TRUE |
| 9-ACC-ICNST        | PIK3CA | p.Glu542Lys  | missense_variant                         | 3  | 178936082 | G  | A  | SNV   | 128 | 25.00% | 1    | Driver    | CANCER          | .   | TRUE | TRUE | TRUE |
| 9-ACC-ICNST        | TP53   | p.Met237Ile  | missense_variant                         | 17 | 7577570   | C  | T  | SNV   | 107 | 88.79% | 1    | Driver    | CANCER          | .   | TRUE | TRUE | TRUE |
| 9-MGA              | INPP4B | p.Asn223Tyr  | missense_variant                         | 4  | 143181666 | T  | A  | SNV   | 51  | 13.73% | 1    | .         | PASSENGER/OTHER | .   | .    | .    | TRUE |
| 9-MGA-DCIS         | DCHS2  | p.Ile415Met  | missense_variant                         | 4  | 155254618 | A  | C  | SNV   | 87  | 9.20%  | 1    | Passenger | PASSENGER/OTHER | .   | .    | .    | TRUE |
| 9-MGA-DCIS         | MACF1  | p.Gly3580Asp | missense_variant                         | 1  | 39895535  | G  | A  | SNV   | 107 | 12.15% | 1    | Passenger | PASSENGER/OTHER | .   | .    | .    | TRUE |
| 9-MGA-DCIS         | MAP2K2 | p.Asp311Tyr  | missense_variant                         | 19 | 4097330   | C  | A  | SNV   | 188 | 4.79%  | 1    | Passenger | CANCER          | .   | .    | .    | TRUE |
| 9-MGA-DCIS         | PRKCG  | p.Ala651Val  | missense_variant                         | 19 | 54410007  | C  | T  | SNV   | 97  | 8.25%  | 1    | Passenger | PASSENGER/OTHER | .   | .    | .    | TRUE |
